# Understanding the evolution of multiple drug resistance in structured populations

David V. McLeod<sup>\*1</sup> and Sylvain Gandon<sup>†1</sup>

<sup>1</sup>Centre D'Ecologie Fonctionnelle & Evolutive, CNRS, Montpellier, France

## Abstract

The evolution of multidrug resistance (MDR) is a pressing public health concern. Yet many aspects, such as the role played by population structure, remain poorly understood. Here we argue that studying MDR evolution by focusing upon the dynamical equations for linkage disequilibrium (LD) can greatly simplify the calculations, generate more insight, and provide a unified framework for understanding the role of population structure. We demonstrate how a general epidemiological model of MDR evolution can be recast in terms of the LD equations. These equations reveal how the different forces generating and propagating LD operate in a dynamical setting at both the metapopulation and population level. We then apply these insights to show how the LD perspective: (i) provides a simple interpretative framework for transient evolutionary dynamics, (ii) explains equilibrium patterns of MDR, and (iii) can be used to assess the MDR consequences of different drug prescription strategies.

**Keywords:** antibiotic resistance, multidrug resistance, linkage disequilibrium, evolutionary epidemiology

---

\* david.mcleod@cefe.cnrs.fr

† sylvain.gandon@cefe.cnrs.fr

## 1 Introduction

2 Antibiotic resistance is one of the biggest current public health problems, with antibiotic resis-  
3 tant infections responsible for tens of thousands of deaths annually [1]. Of particular concern is  
4 the evolution of *multidrug resistant* (MDR) pathogens, that is, pathogens resistant to multiple  
5 classes of antibiotics. Despite its importance, understanding the evolution of MDR remains an  
6 ongoing challenge, as it is typically not captured by our understanding of the evolution of single  
7 drug resistance [for which there is a large body of theory; e.g., 2–6]. For instance, suppose we  
8 have two drugs,  $A$  and  $B$ , and that a fraction  $p_{AB}$  of infections caused by the pathogen of in-  
9 terest are resistant to both drugs. To understand MDR evolution, we need to understand what  
10 determines the frequency  $p_{AB}$ . If  $p_A$  and  $p_B$  are the frequency of infections resistant to drug  $A$   
11 and  $B$ , and  $D$  denotes any non-random association between resistance to drugs  $A$  and  $B$ , then

$$p_{AB} = p_A p_B + D. \quad (1)$$

12 If  $D = 0$ , then the evolution of resistance to each drug is independent, and so multiple drugs  
13 will not qualitatively alter the evolutionary dynamics of single drug resistance. However, when-  
14 ever  $D \neq 0$ , understanding the fitness costs and benefits of resistance to each drug in isolation  
15 is insufficient to understand the evolution of MDR, because doing so will not tell us what fac-  
16 tors govern the propagation of  $D$ . Thus the challenge of understanding MDR evolution can be  
17 recast as understanding the dynamics of  $D$ . As it turns out, the quantity  $D$  is referred to as *link-*  
18 *age disequilibrium* (LD), and it has been extensively studied in population genetics [e.g., 7–12],  
19 particularly as it relates to population structure [13–16]. However, there has been little attempt  
20 to apply these insights to MDR evolution; often the dynamics of doubly-resistant infections are  
21 neglected to simplify the analysis of the dynamics of single drug resistance [e.g., 3, 5, 17].

22 Here we consider a simple epidemiological model of a primarily asymptotically carried  
23 pathogen (e.g., *Staphylococcus* spp. or *Enterococcus* spp.) in a structured host population. We  
24 show how this model relates to general dynamical equations for LD [18], in turn revealing the  
25 role of population structure in MDR evolution. We then use these equations to show how ana-  
26 lyzing problems from the LD perspective: (i) provides a straightforward framework for under-  
27 standing transient evolutionary dynamics, which we use to explain patterns of MDR in *Strep-*  
28 *tococcus pneumoniae*; (ii) reveals the evolutionary logic underlying patterns of MDR at equi-  
29 librium, which we use to reexamine a recent paper on MDR evolution [19]; and (iii) provides  
30 insight on the consequences different drug prescription strategies have on MDR, which we ap-  
31 ply to a hospital-community setting.

## 32 Model

33 In what follows we will introduce and analyze a model of MDR evolution. We will highlight  
34 the most important aspects here while providing more extensive details in the Supplementary  
35 Material.

36 Consider an asymptotically carried pathogen in a metapopulation consisting of  $N$  host  
37 populations. Focus upon population  $X$ . Let  $S^X$  and  $I_{ij}^X$  denote the density of susceptible hosts  
38 and  $ij$ -infections, respectively, at time  $t$ , where  $i$  indicates if the infection is resistant ( $i = A$ ) or  
39 not ( $i = a$ ) to drug  $A$  and  $j$  indicates if the infection is resistant ( $j = B$ ) or not ( $j = b$ ) to drug  $B$ .  
40 Susceptible hosts contract  $ij$ -infections at a per-capita rate  $\beta_{ij}^X I_{ij}^X$ , where  $\beta_{ij}^X$  is a rate constant,

41 while  $ij$ -infections are naturally cleared at a per-capita rate  $\alpha_{ij}^X$ . Hosts are treated with drugs  $A$ ,  
 42  $B$ , or both in combination, at per-capita rates  $\tau_A^X$ ,  $\tau_B^X$ , and  $\tau_{AB}^X$ , respectively. Hosts move from  
 43 population  $X$  to  $X'$  at a per-capita rate  $m^{X \rightarrow X'}$ . Transmission between infected hosts leads to  
 44 superinfection with probability  $\sigma$ , in which either strain is equally likely to be the victor. Finally,  
 45 individual infections acquire allele  $\ell$  through either mutation or recombination (during super-  
 46 infection) at per-capita rates  $\mu_\ell^X$  and  $\rho_\ell^X$ , respectively (note that  $\rho_\ell^X$  depends upon infection  
 47 densities).

48 From these epidemiological assumptions the change in  $ij$ -infections in population  $X$  can  
 49 be written as the sum of four processes

$$\frac{dI_{ij}^X}{dt} = \underbrace{(r^X + \mathbf{1}_A s_A^X + \mathbf{1}_B s_B^X + \mathbf{1}_{AB} s_{AB}^X)}_{\text{per-capita growth}} I_{ij}^X + \underbrace{\Delta\mu_{ij}^X}_{\text{mutation}} + \underbrace{\Delta\rho_{ij}^X}_{\text{recombination}} + \underbrace{\sum_{k=1}^N (m^{k \rightarrow X} I_{ij}^k - m^{X \rightarrow k} I_{ij}^X)}_{\text{migration}}, \quad (2)$$

50 where  $\mathbf{1}_\ell$  is equal to 1 if the  $ij$ -infection has allele(s)  $\ell$  and 0 otherwise and  $\Delta\mu_{ij}^X$  and  $\Delta\rho_{ij}^X$   
 51 denote the net change in  $ij$ -infections due to mutation and recombination (Fig. 1). To facil-  
 52 itate comparison with previous results, we have broken the per-capita growth term into four  
 53 components: the ‘baseline’ per-capita growth rate,  $r^X$ , the (additive) selection coefficients for  
 54 resistance to drugs  $A$  and  $B$ ,  $s_A^X$  and  $s_B^X$ , and any epistatic interactions,  $s_{AB}^X$ . These latter terms  
 55 have the standard interpretation. If  $s_A^X > 0$  (resp.  $s_B^X > 0$ ), then resistance to drug  $A$  (resp.  $B$ )  
 56 is selected for. If  $s_{AB}^X > 0$ , there is positive epistasis, and the per-capita growth rate of doubly-  
 57 resistant infections is greater than would be expected by consideration of the per-capita growth  
 58 rate of singly-resistant infections. Thus although equation (2) is derived from a specific model,  
 59 the partitioning is very general and applies to many epidemiological scenarios.

60 While system (2) contains all of the information necessary to analyze MDR evolution, as  
 61 currently written it is particularly opaque for providing insight. Therefore we would like to  
 62 transform it to a form which brings to the forefront the different factors that promote or im-  
 63 pede MDR evolution; the way to do this is by focusing upon the dynamical equations for link-  
 64 age disequilibrium (LD). However, the inclusion of multiple populations means that doing so  
 65 is not as simple as equation (1) would suggest since there are different scales at which LD and  
 66 MDR can be measured. As the scale which is of most interest will depend upon the specifics  
 67 of the problem, in what follows we will consider MDR evolution at both the population- and  
 68 metapopulation-level.

## 69 Population-level multidrug resistance

70 To understand MDR evolution in a given population, say  $X$ , we need to understand the dynam-  
 71 ics of the frequency of infections resistant to drug  $A$  and  $B$ ,  $p_A^X$  and  $p_B^X$ , and the dynamics of  
 72 population LD,  $D^X$ . First, consider the dynamics of  $p_A^X$  (mutatis mutandis  $p_B^X$ ). Using equation

73 (2), it is straightforward to compute

$$\frac{dp_A^X}{dt} = \underbrace{s_A^X p_A^X (1 - p_A^X)}_{\text{direct selection}} + \underbrace{s_B^X D^X}_{\text{indirect selection}} + \underbrace{s_{AB}^X p_A^X (1 - p_A^X) \frac{p_{AB}^X}{p_A^X}}_{\text{epistasis}} + \underbrace{(\mu_A^X + \rho_A^X)(1 - p_A^X) - (\mu_a^X + \rho_a^X)p_A^X}_{\text{mutation and recombination}} - \underbrace{\sum_{k=1}^N m^{k \rightarrow X} \frac{I^k}{I^X} (p_A^X - p_A^k)}_{\text{migration}}. \quad (3)$$

74 where  $I^X$  is the total density of infections in population  $X$ . A related formulation to equation  
75 (3) can be found in [18] [see also 11].

76 Equation (3) is partitioned into recognizable quantities. First, if resistance to drug  $A$  is selec-  
77 tively advantageous,  $s_A^X > 0$ , then drug  $A$  resistance will increase due to direct selection whose  
78 strength is dictated by the genetic variance at the locus,  $p_A^X(1 - p_A^X)$  [18]. Second, if doubly-  
79 resistant infections are overrepresented in the population,  $D^X > 0$ , and resistance to drug  $B$   
80 is selected for,  $s_B^X > 0$ , then drug  $A$  resistance will increase due to indirect selection upon re-  
81 sistance to drug  $B$ . Third, if epistasis is positive,  $s_{AB}^X > 0$ , and there is genetic variance at the  
82 locus, drug  $A$  resistance will increase due to the disproportionate growth of doubly-resistant  
83 infections. Fourth, mutation and recombination will increase drug  $A$  resistance when there is  
84 a mutation or recombination bias towards gain of drug  $A$  resistance,  $\mu_A^X > \mu_a^X$  or  $\rho_A^X > \rho_a^X$ , and  
85 the frequency of infections sensitive to drug  $A$  exceeds the frequency of infections resistant to  
86 drug  $A$ ,  $1 - p_A^X > p_A^X$ . Finally, migration acts to reduce differences between populations.

87 It follows that drug  $B$  treatment alters the predicted dynamics of resistance to drug  $A$  via  
88 two main effects: (i) the influence of epistasis and (ii) indirect selection on resistance to drug  $B$   
89 mediated through the presence of LD ( $D^X \neq 0$ ). Thus consider the dynamics of  $D^X$ ,

$$\frac{dD^X}{dt} = \underbrace{(s_A^X - s^X + s_B^X - s^X)D^X}_{\text{selection}} - \underbrace{(\mu^X + \rho^X)D^X}_{\text{mutation and recombination}} + \underbrace{s_{AB}^X p_{AB}^X p_{ab}^X}_{\text{epistasis}} - \underbrace{\sum_{k=1}^N m^{k \rightarrow X} \frac{I^k}{I^X} (D^X - D^k - (p_A^X - p_A^k)(p_B^X - p_B^k))}_{\text{migration}}, \quad (4)$$

90 where  $s^X = p_A^X s_A^X + p_B^X s_B^X + p_{AB}^X s_{AB}^X$  is the average selection for resistance, and  $\mu^X$  and  $\rho^X$  are the  
91 total per-capita rates of mutation and recombination, respectively (e.g.,  $\mu^X = \mu_a^X + \mu_A^X + \mu_b^X + \mu_B^X$ ).

92 Equation (4) is partitioned into four key processes. First, excess selection for resistance to  
93 drug  $A$  (resp.  $B$ ),  $s_A^X - s^X$ , can cause pre-existing LD ( $D^X \neq 0$ ) to increase or decrease. For  
94 example, if  $s_A^X > s^X$  and  $D^X > 0$  then LD will increase. This is because drug  $A$  resistant in-  
95 fections are fitter than the average resistant infection and so will increase in frequency. Since  
96  $D^X > 0$ , it is more likely this increase will occur in doubly-resistant infections, thereby increas-  
97 ing  $D^X$ . Second, mutation and recombination removes any LD present at a rate proportional  
98 to the LD [11, 12]. Third, epistasis generates same-sign LD, that is, positive epistasis,  $s_{AB}^X > 0$ ,  
99 leads to MDR overrepresentation,  $D^X > 0$  [7, 8, 20, 21]. Positive epistasis could occur if double-  
100 resistance costs are less than expected [22–24] or drugs are prescribed in combination [18, 25].

101 Migration is the final term of equation (4) and reveals how the metapopulation structure  
102 affects population LD. Like epistasis, migration does not require pre-existing LD to operate on

103 LD [9, 13–15, 26]. In particular, LD in population  $X$  will be generated whenever the frequencies  
104 of resistance to drugs  $A$  and  $B$  differ between population  $X$  and any other connected popula-  
105 tion, say  $X'$ . If both types of resistance are more common in one population than the other,  
106  $(p_A^X - p_A^{X'})(p_B^X - p_B^{X'}) > 0$ , then migration will generate positive LD in both populations,  $D^X > 0$   
107 and  $D^{X'} > 0$ . If instead drug  $A$  resistance is more prevalent in one population, while drug  $B$   
108 resistance is more prevalent in the other, migration will generate negative LD in both popula-  
109 tions.

110 Notice the presence of the multiplier  $I^k/I^X$  in the final term of equation (4). If the popu-  
111 lations have roughly the same density of infections, then this term is unimportant. However,  
112 when one population, say  $X'$ , has much fewer total infections than population  $X$ ,  $I^{X'} \ll I^X$ , the  
113 term  $I^X/I^{X'}$  will be very large whereas  $I^{X'}/I^X$  will be very small. Consequently, the ability of mi-  
114 gration to propagate LD will be greater in population  $X'$  than  $X$ , and so all else being equal we  
115 would predict the population with a lower density of infections will have a greater magnitude  
116 of LD than the population with a higher density of infections.

117 The next insight shows the importance of also taking into account equation (3). In par-  
118 ticular, if we only inspected the migration term of equation (4) we might conclude that as the  
119 per-capita migration rate,  $m^{k \rightarrow X}$ , increases, so too will the ability of migration to propagate  
120 LD. However, the magnitude of population LD is actually maximized at intermediate migration  
121 rates (Fig. 2). The reason is because the quantity  $m^{k \rightarrow X}$  has two effects. On the one hand, it  
122 directly multiplies the migration term in equation (4) thereby magnifying migration's potential  
123 role in LD build-up, while on the other hand, it also balances infection frequencies between  
124 populations (equation (3)), which in turn will reduce the magnitude of  $(p_A^X - p_A^k)(p_B^X - p_B^k)$  in  
125 equation (4). These conflicting forces mean the magnitude of population LD tends to be maxi-  
126 mized when migration is neither too infrequent nor too frequent (Fig. 2).

## 127 **Metapopulation-level multidrug resistance**

128 Now what happens to LD and MDR evolution at the metapopulation-level? Metapopulation  
129 LD, or total LD, can be defined in terms of the population variables as

$$D_{\text{tot}} \equiv D + \text{cov}(p_A, p_B), \quad (5)$$

130 that is,  $D_{\text{tot}}$  is the sum of the average population LD,  $D$ , and the spatial covariance between  
131 resistance to drugs  $A$  and  $B$ . As our goal is to understand how population structure shapes  
132 the dynamics of  $p_A$ ,  $p_B$ , and  $D_{\text{tot}}$ , for clarity we will split the terms in the dynamical equations  
133 into two groups. In the first group are those terms (or processes) which are always operating,  
134 irrespective of population structure, and so can be expressed in terms of the metapopulation-  
135 level variables  $p_\ell$  and  $D_{\text{tot}}$ . The second group consists of those processes which only operate if  
136 the populations differ (i.e., there is spatial heterogeneity). It is the latter group which is crucial  
137 to understanding how population structure shapes population MDR, and so will be our focus  
138 here.

139 With this in mind, the change in frequency of infections resistant to drug  $A$  (mutatis mutan-

140 dis drug  $B$ ) can be written

$$\frac{dp_A}{dt} = \underbrace{s_A p_A (1 - p_A)}_{\text{direct selection}} + \underbrace{s_B D_{\text{tot}}}_{\text{indirect selection}} + \underbrace{s_{AB} p_A (1 - p_A) \frac{p_{AB}}{p_A}}_{\text{epistasis}} + \underbrace{(\mu_A + \rho_A)(1 - p_A) - (\mu_a + \rho_a)p_A}_{\text{mutation and recombination}} + \underbrace{\text{cov}(r, p_A)}_{\text{heterogeneity in 'baseline' growth}} + \underbrace{p_B \text{cov}\left(s_B, \frac{p_{AB}}{p_B}\right)}_{\text{heterogeneity in indirect selection}}, \quad (6)$$

141 where  $s_\ell$ ,  $r$ ,  $\mu_\ell$ ,  $\rho_\ell$  are the average of their respective population quantities. The first four terms  
 142 in equation (6) are the metapopulation-level analogues of the first four terms in equation (3);  
 143 since they share the same interpretation, we do not discuss them further here. The last two  
 144 terms, however, arise due to spatial heterogeneity in ‘baseline’ growth and selection and so are  
 145 the consequence of population structure.

146 First, spatial heterogeneity arises through differences in the ‘baseline’ per-capita growth  
 147 (i.e.,  $r^X \neq r^{X'}$ ) coupled with differences in the frequencies of drug  $A$  resistant infections (e.g.,  
 148  $p_A^X \neq p_A^{X'}$ ). In particular, more productive (larger  $r^X$ ) populations will have a disproportionate  
 149 effect on the change in drug  $A$  resistance. For example, if more productive populations also  
 150 have a greater frequency of drug  $A$  resistance, then heterogeneity increases the population fre-  
 151 quency of drug  $A$  resistance. Heterogeneity in baseline growth could arise through a variety of  
 152 mechanisms, such as availability of susceptible hosts, treatment rates differences, or pathogen  
 153 traits (e.g., transmissibility and duration of carriage).

154 Second, spatial heterogeneity arises through differences in indirect selection for resistance  
 155 to drug  $B$  (i.e.,  $s_B^X \neq s_B^{X'}$ ) coupled with differences in the probability that drug  $B$  resistant infec-  
 156 tions are also doubly-resistant (i.e.,  $p_{AB}^X / p_B^X \neq p_{AB}^{X'} / p_B^{X'}$ ). In particular, populations experienc-  
 157 ing greater selection for resistance to one drug will have a disproportionate effect on the change  
 158 in frequency of infections resistant to the other drug, whenever populations differ in frequency  
 159 of doubly-resistant infections. As an example, if populations experiencing stronger selection  
 160 for drug  $B$  resistance also have a greater probability of drug  $B$ -resistant infections being doubly-  
 161 resistant, heterogeneity in indirect selection increases the frequency of drug  $A$  resistance in the  
 162 metapopulation.

163 Next, the dynamics of metapopulation, or total, LD can be written as

$$\frac{dD_{\text{tot}}}{dt} = \underbrace{(s_A - s + s_B - s)D_{\text{tot}}}_{\text{selection}} - \underbrace{(\mu + \rho)D_{\text{tot}}}_{\text{mutation and recombination}} + \underbrace{s_{AB} p_{ab} p_{AB}}_{\text{epistasis}} + \underbrace{\text{cov}(r, D) + \text{coskew}(r, p_A, p_B)}_{\text{heterogeneity in 'baseline' growth}} + \underbrace{\sum_{\ell \in \{A, B\}} (1 - p_\ell) p_\ell \text{cov}\left(s_\ell, \frac{p_{AB}}{p_\ell}\right)}_{\text{heterogeneity in resistance selection}}, \quad (7)$$

164 where  $\text{coskew}(r, p_A, p_B)$  is the coskewness between  $r$ ,  $p_A$ , and  $p_B$  and we have assumed pop-  
 165 ulation differences in mutation and recombination are negligible (see Sup. Mat. 1.2). The first  
 166 three terms in equation (7) are the metapopulation level analogues of the first three terms of  
 167 equation (4) and so share the same interpretation. The last two terms, however, arise due to  
 168 spatial heterogeneity in ‘baseline’ growth and selection.

169 First, spatial heterogeneity arises through differences in the ‘baseline’ per-capita growth in  
170 doubly-resistant infections ( $r^X \neq r^{X'}$ ) coupled with heterogeneities in LD ( $D^X \neq D^{X'}$ ) or resis-  
171 tance frequencies (the coskewness term). The logic of the first term is clear: when population  
172 LD differs, more productive populations will disproportionately contribute to total LD. For the  
173 second term, more productive populations with higher frequencies of resistance will tend to  
174 produce more doubly-resistant infections; although this need not directly effect population LD,  
175 it will disproportionately contribute to total LD.

176 Second, spatial heterogeneity arises through differences in selection for resistance ( $s_\ell^X \neq$   
177  $s_\ell^{X'}$ ) coupled with differences in the proportion of drug  $\ell$  resistant infections that are doubly-  
178 resistant ( $p_{AB}^X/p_\ell^X \neq p_{AB}^{X'}/p_\ell^{X'}$ ). The logic here is that populations experiencing stronger selec-  
179 tion for resistance are more likely to see an increase in resistant infections. If this increase oc-  
180 curs disproportionately in doubly-resistant infections, then from equation (1) total LD will in-  
181 crease, whereas if this increase occurs disproportionately in singly-resistant infections, total LD  
182 will decrease. The magnitude of this effect is scaled by  $p_\ell(1 - p_\ell)$  since selection cannot operate  
183 without genetic variation. As before, in the absence of population LD, then provided popula-  
184 tions experiencing stronger selection for resistance to one drug also have a greater frequency  
185 of infections resistant to the other drug, total LD will increase. This could occur if, for example,  
186 some populations experience greater treatment rates.

187 As a final note, observe that in contrast to equation (4), in equation (7) the per-capita  
188 migration rates  $m^{k \rightarrow X}$  are nowhere to be found. The reason for this is intuitive: as migration  
189 does not affect the total density of infecteds, nor the resistance status of an infection, it will not  
190 change the quantities  $p_{AB}$ ,  $p_A$ , or  $p_B$ , and so cannot change total LD. As a consequence, migra-  
191 tion only affects total LD indirectly by reducing differences in infection frequency between pop-  
192 ulations, thereby dampening the magnitude (and hence effect) of  $\text{cov}(r, p_\ell)$ ,  $\text{coskew}(r, p_A, p_B)$ ,  
193 and  $\text{cov}(s_\ell, p_{AB}/p_\ell)$  in equation (7). It follows that, all else being equal,  $D_{\text{tot}}$  is a decreasing  
194 function of the per-capita migration rate, and so is maximized when migration is infrequent  
195 (Fig. 2).

## 196 **Modeling the dynamics of LD: why bother?**

197 To this point we have focused upon developing the LD perspective to provide a conceptual un-  
198 derstanding of MDR evolution in structured populations. However, framing the LD perspective  
199 in terms of general quantities has meant this conceptual understanding is somewhat abstract.  
200 What we now wish to demonstrate, through the consideration of three scenarios, is how the LD  
201 perspective can be used to tackle practical problems. In the first scenario, we show how the LD  
202 perspective allows for a straightforward understanding of transient dynamics, and apply this  
203 insight to explain patterns of MDR observed in *Streptococcus pneumoniae*. In the second sce-  
204 nario, we show how the LD perspective helps us generalize a recent paper on equilibrium pat-  
205 terns of MDR. In the third scenario we show how the LD perspective generates practical insight  
206 into designing drug prescription strategies across populations, with a focus upon a hospital-  
207 community setting.

## 208 **LD perspective explains transient patterns of MDR**

209 In many circumstances we are interested in the transient dynamics of MDR, whether it be to ei-  
210 ther understand selective sweeps [27, 28], or processes which unfold over sufficiently long time  
211 so as to appear in equilibrium [29], or anything in between. However, transient dynamics are  
212 more complex than equilibrium processes, and so pose a challenge. In certain circumstances,  
213 approximations can simplify the analysis. For example, if selection is sufficiently weak and re-  
214 combination frequent, then the LD dynamics occur rapidly relative to changes in allele fre-  
215 quencies, and so a quasi-linkage equilibrium approximation can be used [27, 30, 31]. Yet what  
216 about situations in which there are no readily available approximations? In these cases, to un-  
217 derstand what is (transiently) occurring requires consideration of the dynamical equations (4)  
218 and (7). Here we show how transient dynamics coupled with epistasis can explain the patterns  
219 of MDR observed in *Streptococcus pneumoniae* [32].

220 Understanding the patterns of MDR observed in *S. pneumoniae* was first tackled in an im-  
221 portant recent paper by [19], using a metapopulation model in which each population repre-  
222 sents a different serotype maintained by serotype-specific host immunity [19, 33–35]. In the  
223 analysis of [19], they focused upon a metapopulation at equilibrium, and compared their pre-  
224 dictions for total (metapopulation) LD and MDR to that of the Maela data set of [32]. However,  
225 at equilibrium, the model of [19] predicts each serotype will be in linkage equilibrium,  $D^X = 0$ ,  
226 whereas examination of the Maela data reveals that although variation between serotypes ac-  
227 counts for some of the total LD, there also exists significant, unexplained serotype LD (Fig. 3).  
228 Can transient dynamics explain this presence of serotype LD?

229 To explore this possibility, we first need to establish a scenario in which the transient dy-  
230 namics unfold. In particular, consider a metapopulation initially treated with drug *A* at suffi-  
231 ciently high rates such that resistance is selected for. At some point ( $t = 500$  in Fig. 4), drug  
232 *B* is ‘discovered’ and is prescribed to patients, while owing to its reduced efficacy, prescrip-  
233 tion of drug *A* declines. The increase in drug *B* prescription means that for many serotypes,  
234 resistance to drug *B* is now favoured,  $s_B^X > 0$ , and so we should expect drug *B* resistance to  
235 rise in frequency in the metapopulation. However, the reduction in drug *A* prescription means  
236 that for some serotypes, drug *A* resistance will no longer be favoured,  $s_A^X < 0$ . Because drug  
237 *A* resistance has reached fixation for many serotypes, drug *B* resistance is often more likely  
238 to occur in an infection with a genetic background resistant to drug *A*. This will cause both  
239 doubly-resistant infections (which benefit from resistance to drug *B*) and sensitive infections  
240 (which have lost resistance to drug *A* but have yet to gain resistance to drug *B*) to rise to high  
241 frequencies. As more time elapses, in the serotypes for which drug *A* sensitivity and drug *B*  
242 resistance is favoured, doubly-resistant and sensitive infections will be replaced by infections  
243 singly-resistant to drug *B*. Depending upon the mutation/recombination rates, this process  
244 can take enormous amounts of time, generating long periods of apparent stasis in which the  
245 population appears to be in equilibrium (see the first row of Fig. 4).

246 Although this process will generate significant transient total LD due to the covariance in  
247 resistance frequency across serotypes, in equation (4) there is nothing generating serotype LD  
248 since migration (i.e., antigenic recombination) is infrequent. This leaves epistasis as the re-  
249 maining (deterministic) force capable of generating serotype LD. Indeed, the addition of epis-  
250 tasis can generate significant, transient LD within serotypes as the transient selective sweeps  
251 are ongoing (Fig. 4). Thus transient dynamics coupled with epistasis can explain the significant  
252 within-serotype LD observed in *Streptococcus pneumoniae*. Critically, in all cases in Figure 4,



253 the LD at both the metapopulation and serotype level is transient, and the final state is linkage  
254 equilibrium. How population structure maintains LD at equilibrium is the focus of the next  
255 example.

## 256 LD perspective explains equilibrium patterns of MDR

257 The paper by [19] focused upon MDR evolution in a metapopulation consisting of independent  
258 host populations (so migration is restricted,  $m^{X \rightarrow X'} \approx 0$ ). They found that at equilibrium, pop-  
259 ulation differences could lead to MDR overrepresentation ( $D_{\text{tot}} > 0$ ), and that populations with  
260 a longer duration of pathogen carriage were more likely to exhibit MDR, a result they attributed  
261 to an increased likelihood of antibiotic exposure. Here we show how employing the LD per-  
262 spective: (i) reveals the evolutionary logic behind what populations differences maintain LD at  
263 equilibrium, and (ii) using these insights allows us to generalize the results to a broader range  
264 of scenarios, beyond variation in duration of carriage. For simplicity, we will assume there is no  
265 epistasis.

266 There are two required conditions to maintain total LD at equilibrium. First, some mech-  
267 anism needs to maintain resistance diversity (variation in  $p_A^X$  and  $p_B^X$ ) in the metapopulation.  
268 There are variety of ways in which this could occur [19, 35–38], but [19, 35] assume it is due to  
269 population differences in the conditions favouring resistance evolution. Since there is no mech-  
270 anism maintaining within-population diversity, this implies that at equilibrium  $D^X = 0$ , and so  
271 from equation (5) it follows that  $D_{\text{tot}} = \text{cov}(p_A, p_B)$ . Thus the second condition required for total  
272 LD is that  $p_A$  and  $p_B$  covary. Specifically, whenever  $p_A^X$  and  $p_B^X$  (or their dynamical equations,  
273 (3)), are uncorrelated, the metapopulation will be in linkage equilibrium. From equation (3)  
274 we see that if the additive selection coefficients,  $s_A^X$  and  $s_B^X$ , are uncorrelated, then so too are  
275 the dynamics of  $p_A^X$  and  $p_B^X$ , and so  $\text{cov}(p_A, p_B) = 0$ . Hence only when population differences  
276 generate correlations between the selection coefficients will they generate LD.

277 Using this insight, why are populations with a longer duration of carriage associated with  
278 MDR? And should we expect associations between MDR and any other population attributes?  
279 Our primary focus is whether (and how) the selection coefficients are correlated. It is straight-  
280 forward to compute (see Sup. Mat. 1.4.2),

$$s_A^X = -(\beta_{ab}^X - \beta_{Ab}^X)S^X - (\alpha_{Ab}^X - \alpha_{ab}^X) + \tau_A^X, \quad (8)$$

281 where we have used slightly different notation from [19]. Now, consider a scenario in which  
282 both the treatment rates and the parameters controlling the (additive) costs of resistance (e.g.,  
283  $\beta_{ab}^X - \beta_{Ab}^X$  and  $\alpha_{Ab}^X - \alpha_{ab}^X$ ) are uncorrelated (this is one of the scenarios presented in Figure 4  
284 of [19]). From equation (8), the only remaining source of correlation is susceptible density,  $S^X$ ,  
285 which plays a role whenever there are explicit transmission costs,  $\beta_{Ab}^X < \beta_{ab}^X$ . At equilibrium,  $S^X$   
286 is determined by pathogen traits such as transmission and duration of carriage, such that ‘fitter’  
287 populations (i.e., those in which pathogens are more transmissible or have longer duration of  
288 carriage) will more substantially deplete susceptibles. By reducing  $S^X$ , ‘fitter’ populations lower  
289 the transmission costs for resistance to either drug, and so double-resistance is more likely to  
290 be selectively advantageous, even when treatment rates are uncorrelated. In turn, this over-  
291 representation of doubly-resistant infections will generate total LD.

292 Thus although variation in duration of carriage can lead to MDR evolution and LD through  
293 its effect upon susceptible density (Fig. 5a), it is neither necessary (the same pattern can be pro-  
294 duced by variation in transmissibility; Fig. 5b) nor sufficient (variation in duration of carriage

295 has no effect without explicit transmission costs, Fig. 5c). More broadly, if there are more than  
296 two drugs, then provided that there are explicit transmission costs for resistance to each drug,  
297 susceptible density will generate a correlation between all the selection coefficients, which in  
298 turn will yield the pattern of ‘nestedness’ observed by [19]. What is critical for this effect to  
299 be prominent, however, is that there is clear differentiation in population susceptible density,  
300 and that the parameters controlling cost of resistance (i.e.,  $\beta_{ab}^X - \beta_{Ab}^X$ ), are large enough so as to  
301 ensure a strong correlation amongst selection coefficients.

## 302 **LD perspective helps identify drug prescription strategies limiting the evolu-** 303 **tion of MDR**

304 Owing to its practical relevance for public health, often we are interested in the consequences  
305 different antibiotic deployment strategies across/between populations can have. The popu-  
306 lations of interest could correspond to physically distinct groups such as a hospital and its  
307 broader community, or different geographical regions (e.g., countries). From a public health  
308 perspective, when considering different antibiotic deployment strategies, a variety of factors  
309 must be considered, but in general the goal is to successfully treat as many people as possible,  
310 thereby reducing the total burden [3, 39]. In this circumstance, the LD in the metapopulation  
311 and/or populations can provide important information about the likelihood of treatment suc-  
312 cess. In particular, for a given population frequency of drug *A* and drug *B* resistance, negative  
313 LD (MDR underrepresentation) increases the likelihood that if treatment with one drug fails  
314 (due to resistance), treatment with the other drug will succeed. On the other hand, positive  
315 LD (MDR overrepresentation) increases the likelihood of treatment failure, since a greater pro-  
316 portion of resistant infections are doubly-resistant and so cannot be successfully treated with  
317 either drug.

318 Equations (4) and (7) show that to generate negative LD, drugs should be deployed in a pop-  
319 ulation specific fashion, that is, drug *A* should be restricted to some populations and drug *B*  
320 restricted to the remaining populations [see also 18, 19]. Doing so will create a negative co-  
321 variance in selection, such that resistance to drug *A* (resp. drug *B*) will be favoured in some  
322 populations and disfavoured in the others. This negative covariance in selection will give rise  
323 to negative LD and MDR underrepresentation. This outcome can occur even when drugs have  
324 to be prescribed at a higher rate in some populations (e.g., some populations are higher risk  
325 groups). If instead drugs are deployed indiscriminately across populations, and in addition,  
326 some populations require more frequent antibiotic prescription, this will yield a positive co-  
327 variance of selection and so generate positive LD and MDR (Fig. 2).

328 As an application of this principle, suppose there are two populations corresponding to a  
329 ‘hospital’ and a ‘community’. In this scenario, the three most commonly debated antibiotic  
330 deployment strategies are: cycling, in which drugs are temporally rotated in the hospital; mix-  
331 ing, in which hospital patients are randomly assigned different antibiotics; and combination  
332 therapy in which drugs are prescribed to patients in combination [e.g., 3–5, 17, 39–41]. There  
333 are two relevant points that hold irrespective of which antibiotic deployment strategy is used.  
334 First, antibiotics are prescribed at significantly higher rates in hospitals than in the community.  
335 Second, because the focal bacteria are commensal all that differs between strategies is what  
336 drug(s) people are prescribed and not the treatment rate. In this scenario, we immediately see  
337 the problems that can arise (Fig. 6). Because the treatment rate is higher in the hospital than in  
338 the community, both mixing and combination therapy will generate a greater relative selective

339 advantage for both types of resistance in the hospital. In turn, this will generate a positive co-  
340 variance of selection, leading to positive LD and MDR overrepresentation. On the other hand,  
341 if we cycle the drugs between the hospital and the community, such that if drug *A* is deployed  
342 in the hospital, drug *B* is deployed in the community, this will generate a negative covariance  
343 in selection, leading to MDR underrepresentation. Note that this logic could equally be applied  
344 if we were considering a network of hospitals; since in that case if we have (say) *N* hospitals,  
345 the LD of the metapopulation is still the average population LD plus the covariance [26]. Thus  
346 although cycling can be either the best or worst option for single drug resistance [17] (see also  
347 Fig. 6), by generating negative LD it can lead to MDR underrepresentation and improved clinical  
348 outcomes.

## 349 **Conclusions**

350 The evolution of multidrug resistant pathogens is a pressing health concern, and is a topic  
351 which is increasingly gaining attention from evolutionary biologists and mathematical mod-  
352 ellers alike. However, the typical process in studying the problem of MDR is to introduce a  
353 model of the form of (2), and then either proceed to a numerical analysis of these equations or  
354 simplify the model further by neglecting the dynamics of double resistant infections [3, 5, 17].  
355 This is because models of MDR evolution rapidly become intractable, a problem which is par-  
356 ticularly acute when incorporating aspects of population structure. Here we have argued that  
357 a more insightful and simplifying approach is the 'linkage disequilibrium perspective': after  
358 specifying the model of interest, as in (2), it is desirable to transform the model into the form  
359 of equations (3), (4), (6), and (7), which brings to the forefront the role played by linkage dis-  
360 equilibrium for MDR evolution in structured populations. Using the linkage disequilibrium  
361 perspective leaves us better equipped to determine what factors are responsible for generating  
362 MDR, and their generality. Moreover, taking such an approach leads to a more straightforward  
363 comparison with existing models and results.

## References

- 364
- 365 [1] O'Neill, J., 2015 Tackling a global health crisis: initial steps. *The Review on Antimicrobial*  
366 *Resistance Chaired by Jim O'Neill* .
- 367 [2] Blanquart, F., 2019 Evolutionary epidemiology models to predict the dynamics of antibi-  
368 otic resistance. *Evol. Appl.* **12**, 365–383.
- 369 [3] Bonhoeffer, S., Lipsitch, M. & Levin, B. R., 1997 Evaluating treatment protocols to prevent  
370 antibiotic resistance. *Proc. Natl. Acad. Sci.* **94**, 12106–12111.
- 371 [4] Lipsitch, M., Bergstrom, C. T. & Levin, B. R., 2000 The epidemiology of antibiotic resistance  
372 in hospitals: paradoxes and prescriptions. *PNAS* **97**, 1938–1943.
- 373 [5] Bergstrom, C. T., Lo, M. & Lipsitch, M., 2004 Ecological theory suggests that antimicrobial  
374 cycling will not reduce antimicrobial resistance in hospitals. *PNAS* **101**, 13285–13290.
- 375 [6] Austin, D. J. & Anderson, R. M., 1999 Studies of antibiotic resistance within the patient,  
376 hospitals and the community using simple mathematical models. *Phil. Trans. R. Soc. B*  
377 **354**, 721–738.
- 378 [7] Lewontin, R. C., 1964 The interaction of selection and linkage I: General conditions; het-  
379 erotic models. *Genetics* **49**, 49–67.
- 380 [8] Felsenstein, J., 1965 The effect of linkage on directional selection. *Genetics* **52**, 349–363.
- 381 [9] Ohta, T., 1982 Linkage disequilibrium due to random genetic drift in finite subdivided pop-  
382 ulations. *Proc. Natl. Acad. Sci.* **79**, 1940–1944.
- 383 [10] Barton, N. H., 1995 Linkage and the limits to natural selection. *Genetics* **140**, 821–841.
- 384 [11] Rice, S. H., 2004 *Evolutionary Theory: Mathematical and Conceptual Foundations*. Sun-  
385 derland, MA, USA: Sinauer Associates.
- 386 [12] Slatkin, M., 2008 Linkage disequilibrium – understanding the evolutionary past and map-  
387 ping the medical future. *Nat. Rev. Genetics* **9**, 477–485.
- 388 [13] Ohta, T., 1982 Linkage disequilibrium with the island model. *Genetics* **101**, 139–155.
- 389 [14] Slatkin, M., 1975 Gene flow and selection in a two-locus system. *Genetics* **81**, 787–802.
- 390 [15] Li, W. & Nei, M., 1974 Stable linkage disequilibrium without epistasis in subdivided popu-  
391 lations. *Theor. Pop. Biol.* **6**, 173–183.
- 392 [16] Nei, M. & Li, W., 1973 Linkage disequilibrium in subdivided populations. *Genetics* **75**, 213–  
393 219.
- 394 [17] Beardmore, R. E., Peña-Miller, R., Gori, F. & Iredell, J., 2017 Antibiotic cycling and antibiotic  
395 mixing: which one best mitigates antibiotic resistance? *Mol. Biol. Evol.* **34**, 802–817.
- 396 [18] Day, T. & Gandon, S., 2012 The evolutionary epidemiology of multilocus drug resistance.  
397 *Evolution* **66**, 1582–1597.

- 398 [19] Lehtinen, S., Blanquart, F., Lipsitch, M. & Fraser, C., 2019 On the evolutionary ecology of  
399 multidrug resistance in bacteria. *PLoS Pathogens*.
- 400 [20] Lewontin, R. C. & Kojima, K., 1960 The evolutionary dynamics of complex polymorphisms.  
401 *Evolution* **14**, 458–472.
- 402 [21] Lewontin, R. C., 1964 The interaction of selection and linkage. II: Optimum models. *Ge-*  
403 *netics* **50**, 757–782.
- 404 [22] Trindade, S., Sousa, A., Xavier, K. B., Dionisio, F., Ferreira, M. G. & Gordo, I., 2009 Positive  
405 epistasis drives the acquisition of multidrug resistance. *PLoS Genetics* **5**.
- 406 [23] MacLean, R. C., Hall, A. R., Perron, G. G. & Buckling, A., 2010 The population genetics of  
407 antibiotic resistance: integrating molecular mechanisms and treatment contexts. *Nature*  
408 *Reviews Genetics* **11**, 405–414.
- 409 [24] Hall, A. R. & MacLean, R. C., 2011 Epistasis buffers the fitness effects of rifampicin-  
410 resistance mutations in *Pseudomonas Aeruginosa*. *Evolution* **65**, 2370–2379.
- 411 [25] Bretscher, M. T., Althaus, C. L., Muller, V. & Bonhoeffer, S., 2004 Recombination in HIV and  
412 the evolution of drug resistance: for better or for worse? *BioEssays* **26**, 180–188.
- 413 [26] Feldman, M. W. & Christiansen, F. B., 1975 The effect of population subdivision on two loci  
414 without selection. *Genet. Res. Camb.* **24**, 151–162.
- 415 [27] Neher, R. A. & Shraiman, B. I., 2011 Statistical genetics and evolution of quantitative traits.  
416 *Rev. Mod. Phys.* **83**, 1283–1300.
- 417 [28] Rouzine, I. M., Rodrigo, A. & Coffin, J. M., 2001 Transition between stochastic evolution  
418 and deterministic evolution in the presence of selection: general theory and application  
419 to virology. *Microbiology and Molecular Biology Reviews* **65**, 151–185.
- 420 [29] Hastings, A., Abbott, K. C., Cuddington, K., Francis, T., Gellner, G., Lai, Y., Morozov, A.,  
421 Petrovskii, S., Scranton, K. & Zeeman, M., 2018 Transient phenomena in ecology. *Science*  
422 **361**, 1–9.
- 423 [30] Kimura, M., 1965 Attainment of quasi-linkage equilibrium when gene frequencies are  
424 changing by natural selection. *Genetics* **52**, 875–890.
- 425 [31] Otto, S. P. & Day, T., 2007 *A Biologist's Guide to Mathematical Modeling in Ecology and*  
426 *Evolution*. Princeton University Press.
- 427 [32] Turner, P., Turner, C., Jankhot, A., Helen, N., Lee, S. J., Day, N. P., White, N. J., Nosten, F. &  
428 Goldblatt, D., 2012 A longitudinal study of *Streptococcus pneumoniae* carriage in a cohort  
429 of infants and their mothers on the Thailand-Myanmar border. *PLoS ONE* **7**.
- 430 [33] Henriques-Normark, B. & Tuomanen, E. I., 2013 The pneumococcus: epidemiology, mi-  
431 crobiology, and pathogenesis. *Cold Spring Harb. Perspect. Med.* pp. 1–15.
- 432 [34] Cobey, S. & Lipsitch, M., 2012 Niche and neutral effects of acquired immunity permit co-  
433 existence of pneumococcal serotypes. *Science* **335**, 1376–1380.

- 434 [35] Lehtinen, S., Blanquart, F., Croucher, N. J., Turner, P., Lipsitch, M. & Fraser, C., 2017 Evolu-  
435 tion of antibiotic resistance is linked to any genetic mechanism affecting bacterial duration  
436 of carriage. *Proc. Natl. Acad. Sci.* **114**, 1075–1080.
- 437 [36] Lipsitch, M., Colijn, C., Cohen, T., Hanage, W. P. & Fraser, C., 2009 No coexistence for free:  
438 neutral null models for multistrain pathogens. *Epidemics* **1**, 2–13.
- 439 [37] Colijn, C., Cohen, T., Fraser, C., Hanage, W., Goldstein, E., Givon-Lavi, N., Dagan, R. &  
440 Lipsitch, M., 2009 What is the mechanism for persistent coexistence of drug-susceptible  
441 and drug-resistant strains of *Streptococcus pneumoniae*? *J. R. Soc. Interface* **7**, 905–919.
- 442 [38] Davies, N. G., Flasche, S., Jit, M. & Atkins, K. E., 2019 Within-host dynamics shape antibiotic  
443 resistance in commensal bacteria. *Nat. Ecol. Evol.* **3**, 440–449.
- 444 [39] zur Wiesch, P. A., Kouyos, R., Abel, S., Viechtbauer, W. & Bonhoeffer, S., 2014 Cycling em-  
445 pirical antibiotic therapy in hospitals: meta-analysis and models. *PLoS Pathogens* **10**.
- 446 [40] Beardmore, R. E. & Peña-Miller, R., 2010 Antibiotic cycling versus mixing: the difficulty of  
447 using mathematical models to definitively quantify their relative merits. *Math. Biosci. Eng.*  
448 **7**, 923–933.
- 449 [41] Tepekule, B., Uecker, H., Derungs, I., Frenoy, A. & Bonhoeffer, S., 2017 Modeling antibiotic  
450 treatment in hospitals: A systematic approach shows benefits of combination therapy over  
451 cycling, mixing, and mono-drug therapies. *PLoS Comp. Biol.* **13**.
- 452 [42] Nowak, M. A. & May, R. M., 1994 Superinfection and the evolution of parasite virulence.  
453 *Proc. R. Soc. B* **255**, 81–89.
- 454 [43] Alizon, S., 2013 Co-infection and super-infection models in evolutionary epidemiology.  
455 *Interface Focus* **3**.
- 456 [44] Weinberger, D. M., Trzcinski, K., Lu, Y., Bogaert, D., Brandes, A., Galagan, J., Anderson, P. W.,  
457 Malley, R. & Lipsitch, M., 2009 Pneumococcal capsular polysaccharide structure predicts  
458 serotype prevalence. *PLoS Pathogens* **5**.
- 459 [45] Zafar, M. A., Hamaguchi, S., Zangari, T., Cammer, M. & Weiser, J. N., 2017 Capsule type and  
460 amount affect shedding and transmission of *Streptococcus pneumoniae*. *mBio* **8**.

## 1 Supplementary Material

Here we provide more comprehensive details on the different equations, variables, and definitions used in the main text.

Our focus is on an asymptotically carried bacteria species in a metapopulation consisting of  $N$  populations. Focus upon an arbitrarily chosen population  $X$ . Let  $S^X$  and  $I_{ij}^X$  denote the density of susceptible hosts and  $ij$ -infections, respectively, at time  $t$ , where  $i$  indicates if the infection is resistant ( $i = A$ ) or not ( $i = a$ ) to drug  $A$  and  $j$  indicates if the infection is resistant ( $j = B$ ) or not ( $j = b$ ) to drug  $B$ . Susceptible hosts contract  $ij$  infections at a per-capita rate  $\beta_{ij}^X I_{ij}^X$ , where  $\beta_{ij}^X$  is a rate constant, while  $ij$ -infections are naturally cleared at a per-capita rate  $\alpha_{ij}^X$ . Hosts in population  $X$  are treated with antibiotics  $A$ ,  $B$ , or both in combination, at per-capita rates  $\tau_A^X$ ,  $\tau_B^X$ , and  $\tau_{AB}^X$ , respectively. Hosts move from population  $X$  to population  $X'$  at a per-capita rate  $m^{X \rightarrow X'}$ .

The resistance profile of an infection changes through two processes. First, there may be de novo mutation, and so let  $\mu_\ell^X$  be the per-capita rate at which an infection in population  $X$  acquires allele  $\ell$  through mutation. Second, a  $ij$ -infection may be superinfected by a  $k\ell$ -strain [42, 43]; in this circumstance recombination may occur. Specifically,  $k\ell$ -strains are transmitted to  $ij$ -infections at rate  $\beta_{k\ell}^X I_{k\ell}^X I_{ij}^X$ , whereupon with probability  $\sigma$  superinfection occurs. In the event of superinfection, with probability  $1 - \rho$ , recombination does not occur, in which case with equal probability the  $ij$ -infection either remains unchanged or becomes a  $k\ell$ -infection. With probability  $\rho$ , recombination does occur, in which case with equal probability the  $ij$ -infection becomes either an  $i\ell$ - or  $kj$ -infection. Because our focus is upon the role of population structure, we do not allow for coinfection or within-host competitive differences based upon resistance profiles [e.g., 38] but these are straightforward extensions. Moreover, at this stage we do not make any further specification of the dynamics of uninfected hosts, be they susceptible or recovered, as doing so is not essential for a qualitative understanding of MDR evolution.

Rather than immediately writing down the set of differential equations corresponding to these epidemiological assumptions, we instead group the terms based upon the four biological processes that are occurring. In particular, the change in  $I_{ij}^X$  can be written as the sum of:

- (1) The net change due to *mutation*, denoted  $\Delta\mu_{ij}^X$ . As an example, focus upon the change in  $Ab$ -infections in population  $X$  due to mutation,  $\Delta\mu_{Ab}^X$ . These infections can increase through mutation in one of two ways: (i)  $ab$ -infections acquiring allele  $A$  at rate  $\mu_A^X I_{ab}^X$ , or (ii)  $AB$ -infections acquiring allele  $b$  at rate  $\mu_b^X I_{AB}^X$ . On the other hand,  $I_{Ab}^X$  infections are lost due to mutation whenever they (i) acquire allele  $a$  at a per-capita rate  $\mu_a^X$ , or (ii) acquire allele  $B$  at a per-capita rate  $\mu_B^X$ . Combining this information gives the change in  $Ab$ -infections in population  $X$  as

$$\Delta\mu_{Ab}^X = \mu_A^X I_{ab}^X + \mu_b^X I_{AB}^X - (\mu_a^X + \mu_B^X) I_{Ab}^X, \quad (9)$$

which is mathematically equivalent to

$$\Delta\mu_{Ab}^X = \mu_A^X (I_{ab}^X + I_{Ab}^X) + \mu_b^X (I_{Ab}^X + I_{AB}^X) - \mu^X I_{Ab}^X, \quad (10)$$

where  $\mu^X \equiv \mu_a^X + \mu_A^X + \mu_b^X + \mu_B^X$  is the per-capita mutation rate in population  $X$ . The only difference between the two formulations is interpretation: equation (9) shows only mutations

499 which lead to a change in state, whereas equation (10) shows all possible mutations, even  
 500 those which do not. This is why the per-capita loss term,  $\mu^X$ , in (10) can be considered the  
 501 total per-capita mutation rate in population  $X$ . More generally, we can write  $\Delta\mu_{ij}^X$  as

$$\Delta\mu_{ij}^X \equiv \mu_i^X (I_{aj}^X + I_{Aj}^X) + \mu_j^X (I_{ib}^X + I_{iB}^X) - \mu^X I_{ij}^X. \quad (11)$$

502 (2) The net change due to *recombination*, denoted  $\Delta\rho_{ij}^X$ . Let  $\rho_\ell^X$  be the per-capita rate at which  
 503 infections gain allele  $\ell$  through recombination. For example, consider  $\rho_A^X$ . In particular,  
 504  $ij$ -infections are challenged by strains carrying allele  $A$  at rate  $(\beta_{Ab}^X I_{Ab}^X + \beta_{AB}^X I_{AB}^X) I_{ij}^X$ . With  
 505 probability  $\sigma$ , a superinfection event occurs. Given an superinfection event, with probabili-  
 506 ty  $\rho$  recombination happens, in which case with probability 1/2 the recombinant strain  $Aj$   
 507 will replace the  $ij$  infection. Thus

$$\rho_A^X = \rho \frac{\sigma}{2} (\beta_{Ab}^X I_{Ab}^X + \beta_{AB}^X I_{AB}^X), \quad (12)$$

508 and  $ij$ -infections acquire allele  $A$  in population  $X$  at rate  $\rho_A^X I_{ij}^W$ . Therefore the change in  
 509  $ij$ -infections in population  $X$  due to recombination is

$$\Delta\rho_{ij}^X \equiv \rho_i^X (I_{aj}^X + I_{Aj}^X) + \rho_j^X (I_{ib}^X + I_{iB}^X) - \rho^X I_{ij}^X \quad (13)$$

510 where  $\rho^X$  is the per-capita rate of recombination in population  $X$ , that is,

$$\rho^X \equiv \rho \sigma \sum_{k\ell} \beta_{k\ell}^X I_{k\ell}^X = \rho_a^X + \rho_A^X + \rho_b^X + \rho_B^X.$$

511 (3) The net change due to host *migration* between populations,

$$- \sum_{k=1}^N m^{X \rightarrow k} I_{ij}^X + \sum_{k=1}^N m^{k \rightarrow X} I_{ij}^k. \quad (14)$$

512 (4) The net change due to *per-capita growth*,

$$r_{ij}^X \equiv \beta_{ij}^X S^X - \alpha_{ij}^X - \mathbf{1}_a(i) \tau_A^X - \mathbf{1}_b(j) \tau_B^X - (1 - \mathbf{1}_{AB}(ij)) \tau_{AB}^X - (1 - \rho) \frac{\sigma}{2} \sum_{k\ell} (\beta_{k\ell}^X - \beta_{ij}^X) I_{k\ell}^X,$$

513 where  $\mathbf{1}_\ell(k)$  is an indicator variable and is equal to 1 if  $\ell = k$  and 0 otherwise.

514 With these four processes in hand, the dynamics of infection densities are given by the system  
 515 of  $4N$  differential equations

$$\frac{dI_{ij}^X}{dt} = \Delta\mu_{ij}^X + \Delta\rho_{ij}^X - \sum_{k=1}^N (m^{X \rightarrow k} I_{ij}^X - m^{k \rightarrow X} I_{ij}^k) + r_{ij}^X I_{ij}^X, \quad X = 1, 2, \dots, N, \quad i \in \{a, A\}, \quad j \in \{b, B\}. \quad (15)$$



## 516 1.1 Population LD and MDR

517 In what follows, we provide more details for the calculations of population LD and MDR. First,  
518 the frequency of infections with allele(s)  $\ell$  or  $k\ell$  in population  $X$  are

$$p_A^X = \frac{\sum_{\ell} I_{A\ell}^X}{I^X}, \quad p_B^X = \frac{\sum_{\ell} I_{\ell B}^X}{I^X}, \quad \text{and} \quad p_{k\ell}^X = \frac{I_{k\ell}^X}{I^X}, \quad (16)$$

519 where  $I^X = \sum_{ij} I_{ij}^X$  is the total density of infections in population  $X$ . Using these definitions, the  
520 standard measure of linkage equilibrium in population  $X$  is

$$D^X = p_{AB}^X - p_A^X p_B^X, \quad (17)$$

521 which is mathematically equivalent to

$$D^X = p_{AB}^X p_{ab}^X - p_{Ab}^X p_{aB}^X. \quad (18)$$

522 The three dynamical equations of interest for studying MDR in population  $X$  are

$$\begin{aligned} \frac{dp_A^X}{dt} &= s_A^X p_A^X (1 - p_A^X) + s_B^X D^X + s_{AB}^X p_A^X (1 - p_A^X) \frac{p_{AB}^X}{p_A^X} + (\mu_A^X + \rho_A^X) (1 - p_A^X) - (\mu_a^X + \rho_a^X) p_A^X \\ &\quad - \sum_{k=1}^N m^{k \rightarrow X} \frac{I^k}{I^X} (p_A^X - p_A^k), \\ \frac{dp_B^X}{dt} &= s_B^X p_B^X (1 - p_B^X) + s_A^X D^X + s_{AB}^X p_B^X (1 - p_B^X) \frac{p_{AB}^X}{p_B^X} + (\mu_B^X + \rho_B^X) (1 - p_B^X) - (\mu_b^X + \rho_b^X) p_B^X \\ &\quad - \sum_{k=1}^N m^{k \rightarrow X} \frac{I^k}{I^X} (p_B^X - p_B^k), \\ \frac{dD^X}{dt} &= (s_A^X - s^X + s_B^X - s^X) D^X - (\mu^X + \rho^X) D^X + s_{AB}^X p_{AB}^X p_{ab}^X \\ &\quad - \sum_{k=1}^N m^{k \rightarrow X} \frac{I^k}{I^X} (D^X - D^k - (p_A^X - p_A^k)(p_B^X - p_B^k)). \end{aligned} \quad (19)$$

523 System (19) contains a number of quantities that we now define in more detail. First, the  
524 (additive) selection coefficient for resistance to drugs  $A$  and  $B$  in population  $X$  are defined as

$$s_A^X = r_{Ab}^X - r_{ab}^X \quad \text{and} \quad s_B^X = r_{aB}^X - r_{ab}^X, \quad (20)$$

525 respectively, while epistasis in population  $X$  is  $s_{AB}^X = r_{AB}^X + r_{ab}^X - r_{Ab}^X - r_{aB}^X$ . It follows that we can  
526 write each of the per-capita growth rates,  $r_{ij}^X$ , as

$$r_{ij}^X = r^X + \mathbf{1}_A(i) s_A^X + \mathbf{1}_B(j) s_B^X + \mathbf{1}_{AB}(ij) s_{AB}^X. \quad (21)$$

527 This is why  $r_{ab}^X = r^X$  can be thought of as ‘baseline’ per-capita growth. We define the average  
528 selection for resistance in population  $X$  as

$$s^X = s_A^X p_A^X + s_B^X p_B^X + s_{AB}^X p_{AB}^X. \quad (22)$$

529 Note that the average per-capita growth rate in population  $X$  is therefore  $r^X + s^X$ , that is, aver-  
530 age per-capita growth rate is the sum of the ‘baseline’ per-capita growth rate and the average  
531 selection for resistance.

## 532 1.2 Metapopulation LD and MDR

533 Next, consider metapopulation (or total) LD and MDR. First, the metapopulation level equiva-  
534 lents of equations (16) are

$$p_A = \sum_{k=1}^N \frac{I^k}{\sum_{j=1}^N I^j} p_A^k, \quad p_B = \sum_{k=1}^N \frac{I^k}{\sum_{j=1}^N I^j} p_B^k, \quad \text{and} \quad p_{ij} = \sum_{k=1}^N \frac{I^k}{\sum_{\ell=1}^N I^\ell} p_{ij}^k. \quad (23)$$

535 The standard measure of linkage disequilibrium at the level of the total population is

$$D_{\text{tot}} = p_{AB} - p_A p_B. \quad (24)$$

536 which in terms of the population level variables is

$$D_{\text{tot}} \equiv \frac{\sum_{k=1}^N I^k D^k}{\sum_{j=1}^N I^j} + \frac{\sum_{k=1}^N I^k p_A^k p_B^k}{\sum_{j=1}^N I^j} - \frac{\sum_{k=1}^N I^k p_A^k}{\sum_{j=1}^N I^j} \frac{\sum_{\ell=1}^N I^\ell p_B^\ell}{\sum_{j=1}^N I^j} = D + \text{cov}(p_A, p_B) \quad (25)$$

537 where  $D$  is the average population LD and  $\text{cov}(p_A, p_B)$  is the covariance between resistance to  
538 drug  $A$  and resistance to drug  $B$ .

539 Using these variables, the three dynamical equations for studying metapopulation MDR are

540

$$\begin{aligned} \frac{dp_A}{dt} &= s_A p_A (1 - p_A) + s_B D_{\text{tot}} + s_{AB} p_A (1 - p_A) \frac{p_{AB}}{p_A} \\ &\quad + (\mu_A + \rho_A)(1 - p_A) - (\mu_a + \rho_a) p_A + \text{cov}(r, p_A) + p_B \text{cov}\left(s_B, \frac{p_{AB}}{p_B}\right), \\ \frac{dp_B}{dt} &= s_B p_B (1 - p_B) + s_A D_{\text{tot}} + s_{AB} p_B (1 - p_B) \frac{p_{AB}}{p_B} \\ &\quad + (\mu_B + \rho_B)(1 - p_B) - (\mu_b + \rho_b) p_B + \text{cov}(r, p_B) + p_A \text{cov}\left(s_A, \frac{p_{AB}}{p_A}\right), \\ \frac{dD_{\text{tot}}}{dt} &= (s_A - s + s_B - s) D_{\text{tot}} - (\mu + \rho) D_{\text{tot}} + s_{AB} p_{ab} p_{AB} + \text{cov}(r, D_{\text{tot}}) + \text{coskew}(r, p_A, p_B) \\ &\quad + \sum_{\ell \in \{A, B\}} (1 - p_\ell) p_\ell \text{cov}\left(s_\ell, \frac{p_{AB}}{p_\ell}\right) + (1 - p_A) \Lambda_{Aa} - p_A \Lambda_{aA} + (1 - p_B) \Lambda_{Bb} - p_B \Lambda_{bB}. \end{aligned} \quad (26)$$

541 Note that in the equation  $dD_{\text{tot}}/dt$ , there are terms involving  $\Lambda_{ij}$  which do not appear in the  
542 main text. These terms are

$$\Lambda_{Aa} = \text{cov}\left(\mu_A + \rho_A, \frac{p_{aB}}{1 - p_A}\right) \quad \text{and} \quad \Lambda_{aA} = \text{cov}\left(\mu_a + \rho_a, \frac{p_{AB}}{p_A}\right), \quad (27)$$

543 while

$$\Lambda_{Bb} = \text{cov}\left(\mu_B + \rho_B, \frac{p_{aB}}{1 - p_B}\right) \quad \text{and} \quad \Lambda_{bB} = \text{cov}\left(\mu_b + \rho_b, \frac{p_{AB}}{p_B}\right). \quad (28)$$

544 Thus the expression

$$(1 - p_A) \Lambda_{Aa} - p_A \Lambda_{aA} + (1 - p_B) \Lambda_{Bb} - p_B \Lambda_{bB} \quad (29)$$

545 in the equation  $dD_{\text{tot}}/dt$  is the effect upon  $D_{\text{tot}}$  of spatial heterogeneity in mutation and re-  
 546 combination rates ( $\mu_\ell^X \neq \mu_\ell^{X'}$  and/or  $\rho_\ell^X \neq \rho_\ell^{X'}$ ) coupled with differences in the proportion of  
 547 infections with allele  $i$  (e.g.,  $i = A$  or  $i = a$ ) that are resistant to the other drug ( $j = B$ ). In par-  
 548 ticular, populations in which infections are more likely to acquire resistance through muta-  
 549 tion/recombination disproportionately effect total LD through an increase in doubly-resistant  
 550 infections. However, these terms are likely to be quite small because they require that substan-  
 551 tial differences in mutation/recombination rates exist between populations. Since these terms  
 552 are unlikely to be a significant contributor to the dynamics of  $D_{\text{tot}}$ , we ignore them in the main  
 553 text.

554 There remains a number of other quantities in system (26) that we now define in more detail.  
 555 First, the probability that an infection resistant to drug  $\ell$  is found in population  $X$  is

$$\frac{I^X}{\sum_{j=1}^N I^j} \frac{p_\ell^X}{p_\ell}. \quad (30)$$

556 For example, if we apply our variable definitions, it is straightforward to show that

$$\frac{I^X}{\sum_{j=1}^N I^j} \frac{p_A^X}{p_A} = \frac{I_{Ab}^X + I_{AB}^X}{\sum_{k=1}^N (I_{Ab}^k + I_{AB}^k)}. \quad (31)$$

557 Next, to compute the metapopulation-level selection coefficients, and mutation/recombination  
 558 rates, we need to compute the weighted average of the population quantities, where the weights  
 559 are the probability that an infection of a particular type is in population  $X$  (calculated above).  
 560 Applying this logic, the metapopulation-level selection coefficients and epistasis are

$$s_\ell = \sum_{k=1}^N \frac{I^k}{\sum_{j=1}^N I^j} \frac{p_\ell^k}{p_\ell} s_\ell^k \quad \text{and} \quad s_{AB} = \sum_{k=1}^N \frac{I^k}{\sum_{j=1}^N I^j} \frac{p_{AB}^k}{p_{AB}} s_{AB}^k. \quad (32)$$

561 The average selection for resistance in the metapopulation is

$$s = s_A p_A + s_B p_B + s_{AB} p_{AB}. \quad (33)$$

562 The per-capita mutation and recombination rates follow similarly. Recall that  $\mu_\ell$  and  $\rho_\ell$  are the  
 563 per-capita rates at which infections gain allele  $\ell$ . Thus, for example,

$$\mu_A = \sum_{k=1}^N \frac{I^k}{\sum_{j=1}^N I^j} \frac{1 - p_A^k}{1 - p_A} \mu_A^k \quad \text{and} \quad \mu_a = \sum_{k=1}^N \frac{I^k}{\sum_{j=1}^N I^j} \frac{p_A^k}{p_A} \mu_a^k. \quad (34)$$

564 Similar calculations can be made to arrive at  $\mu_B$ ,  $\mu_b$ , and the various  $\rho_\ell$ . The total per-capita  
 565 mutation and recombination rates are

$$\mu = \mu_a + \mu_A + \mu_b + \mu_B \quad \text{and} \quad \rho = \rho_a + \rho_A + \rho_b + \rho_B. \quad (35)$$

### 566 1.3 Covariance and coskewness

567 Finally, we also use a number of covariance terms and a coskewness terms. Let  $\mathbb{E}[c]$  denote the  
 568 expectation of the quantity  $c$ . Then applying the definition of covariance, we have

$$\begin{aligned} \text{cov}(p_A, p_B) &= \mathbb{E}[p_A p_B] - \mathbb{E}[p_A] \mathbb{E}[p_B] \\ &= \sum_{k=1}^N \frac{I^k}{\sum_{j=1}^N I^j} p_A^k p_B^k - \left( \sum_{k=1}^N \frac{I^k}{\sum_{j=1}^N I^j} p_A^k \right) \left( \sum_{k=1}^N \frac{I^k}{\sum_{j=1}^N I^j} p_B^k \right) \end{aligned}$$

569 Following the same procedure, we can calculate  $\text{cov}(r, p_A)$  and  $\text{cov}(r, D_{\text{tot}})$ . When the covari-  
 570 ance involves quantities that also specifically depend upon particular allele(s), the only differ-  
 571 ence is that when computing the expectation the probability used is the probability that an  
 572 allele  $\ell$  is in population  $X$ . For example,

$$\begin{aligned} \text{cov}\left(s_A, \frac{p_{AB}}{p_A}\right) &= \mathbb{E}\left[s_A \frac{p_{AB}}{p_A}\right] - \mathbb{E}[s_A]\mathbb{E}\left[\frac{p_{AB}}{p_A}\right] \\ &= \sum_{k=1}^N \frac{I^k}{\sum_{j=1}^N I^j} \frac{p_A^k}{p_A} s_A^k \frac{p_{AB}^k}{p_A^k} - \left(\sum_{k=1}^N \frac{I^k}{\sum_{j=1}^N I^j} \frac{p_A^k}{p_A} s_A^k\right) \left(\sum_{k=1}^N \frac{I^k}{\sum_{j=1}^N I^j} \frac{p_A^k}{p_A} \frac{p_{AB}^k}{p_A^k}\right) \\ &= \sum_{k=1}^N \frac{I^k}{\sum_{j=1}^N I^j} \frac{s_A^k p_{AB}^k}{p_A} - \left(\sum_{k=1}^N \frac{I^k}{\sum_{j=1}^N I^j} \frac{p_A^k}{p_A} s_A^k\right) \left(\sum_{k=1}^N \frac{I^k}{\sum_{j=1}^N I^j} \frac{p_{AB}^k}{p_A}\right) \\ &= \sum_{k=1}^N \frac{I^k p_{AB}^k}{\sum_{j=1}^N I^j} (s_A^k - s_A). \end{aligned}$$

573 The covariance terms involving the recombination and mutation rates follow similarly, with  
 574 the appropriate exchanges of variables. Finally, we have the coskewness term, which can be  
 575 calculated as

$$\begin{aligned} \text{coskew}(r_{ab}, p_A, p_B) &= \mathbb{E}\left[(r_{ab} - \mathbb{E}[r_{ab}])(p_A - \mathbb{E}[p_A])(p_B - \mathbb{E}[p_B])\right] \\ &= \text{cov}(r, p_A p_B) - p_B \text{cov}(r, p_A) - p_A \text{cov}(r, p_B). \end{aligned}$$

## 576 1.4 Specific examples

### 577 1.4.1 Transient dynamics and MDR in *Streptococcus pneumoniae*

578 Here we use a variant of the model originally proposed by [19, 35] in which the populations  
 579 represent different serotypes. ‘Migration’ between serotypes occurs via antigenic recombina-  
 580 tion with probability  $m$ , given transmission between hosts infected with different serotypes has  
 581 occurred. Resistance is gained and lost through unbiased mutation at a per-capita rate  $\mu$  and  
 582 there is no recombination of resistance loci.

583 Applying these assumptions and using the notation presented with our model from the  
 584 main text, this yields

$$\begin{aligned} \frac{dI_{ij}^X}{dt} &= \left(\beta_{ij}^X \nu(I, X) S - \alpha_{ij}^X - \mathbf{1}_a(i) \tau_A - \mathbf{1}_b(j) \tau_B - (1 - \mathbf{1}_{AB}(ij)) \tau_{AB}\right) I_{ij}^X \\ &\quad + \mu \left(\sum_{\ell} (I_{\ell j}^X + I_{i \ell}^X) - 4I_{ij}^X\right) + m \sum_{k=1}^N (\beta_{ij}^X - \beta_{ij}^k) I_{ij}^X I_{ij}^k \end{aligned} \quad (36)$$

585 where

$$\nu(I, X) = \left(1 - \left[\frac{\sum_{ij} I_{ij}^X}{\sum_{k=1}^N \sum_{ij} I_{ij}^k} - \frac{1}{N}\right]\right)^\omega \quad (37)$$

586 is a balancing function intended to mimic the stabilizing effect adaptive host immunity has  
 587 upon serotype diversity ( $\omega$  controls the strength of this effect; see [35]). Note that the treatment  
 588 rates are assumed to be independent of serotype.

589 If we let  $r_{ij}^X$  denote the per-capita growth term of an  $ij$ -infection belonging to serotype  $X$   
 590 (the first term in brackets in equation (36)), we can partition this as

$$r_{ij}^X = r^X + \mathbf{1}_A(i)s_A^X + \mathbf{1}_B(j)s_B^X + \mathbf{1}_{AB}(ij)s_{AB}^X \quad (38)$$

591 where

$$\begin{aligned} r^X &= \beta_{ab}^X \nu(I, X)S - \alpha_{ab}^X - \tau_A - \tau_B - \tau_{AB} \\ s_A^X &= -(\beta_{ab}^X - \beta_{Ab}^X) \nu(I, X)S - (\alpha_{Ab}^X - \alpha_{ab}^X) + \tau_A \\ s_B^X &= -(\beta_{ab}^X - \beta_{aB}^X) \nu(I, X)S - (\alpha_{aB}^X - \alpha_{ab}^X) + \tau_B \\ s_{AB}^X &= (\beta_{ab}^X + \beta_{AB}^X - \beta_{Ab}^X - \beta_{aB}^X) \nu(I, X)S - (\alpha_{ab}^X + \alpha_{AB}^X - \alpha_{Ab}^X - \alpha_{aB}^X) + \tau_{AB} \end{aligned} \quad (39)$$

592 For simplicity we keep total population size constant, and so set  $S = 1 - \sum_{k=1}^N \sum_{ij} I_{ij}^k$ .

593 The simulations in Figure 4 assume the metapopulation is initially treated at per-capita  
 594 rates  $(\tau_A, \tau_B, \tau_{AB}) = (0.12, 0, 0)$ , until  $t = 500$  when these rates switch to  $(\tau_A, \tau_B, \tau_{AB}) = (0.07, 0.1, 0)$ .  
 595 Other parameters values used are  $n = 15$ ,  $\omega = 4$ ,  $\beta_{ab}^X - \beta_{Ab}^X = \beta_{ab}^X - \beta_{aB}^X = 0.2$ ,  $\alpha_{Ab}^X - \alpha_{ab}^X = \alpha_{aB}^X -$   
 596  $\alpha_{ab}^X = 0.05$ ,  $\mu = 10^{-8}$ , and  $m = 10^{-8}$ . Finally, because *Streptococcus* serotypes differ based upon  
 597 duration of carriage and transmissibility, and there is evidence of a positive correlation between  
 598 the two [44, 45],  $\alpha_{ab}^X$  was chosen to assume evenly spaced parameter values from  $\alpha_{ab}^X = 0.2$   
 599 to  $\alpha_{ab}^X = 1$ , while  $\beta_{ab}^X$  was chosen to assume evenly spaced parameter values from  $\beta_{ab}^X = 3$  to  
 600  $\beta_{ab}^X = 3.5$ . Cost epistasis is assumed to solely effect transmissibility. When there is positive epis-  
 601 tasis,  $\beta_{AB}^X + \beta_{ab}^X - \beta_{Ab}^X - \beta_{aB}^X = 0.05$ , whereas for negative epistasis,  $\beta_{AB}^X + \beta_{ab}^X - \beta_{Ab}^X - \beta_{aB}^X = -0.05$ .

#### 602 1.4.2 Equilibrium analysis of metapopulation consisting of independent populations

603 This is a version of one of the models presented in [19]. The metapopulation consists of  $N$   
 604 populations. The populations are independent (i.e, there is no migration between populations),  
 605 and each population is assumed to be of fixed size 1 so  $S^X = 1 - \sum_{ij} I_{ij}^X$ . Resistance is gained and  
 606 lost through unbiased mutation occurring at rate  $\mu$  and there is no recombination. Therefore

$$\frac{dI_{ij}^X}{dt} = \left( \beta_{ij}^X S^X - \alpha_{ij}^X - \mathbf{1}_a(i)\tau_A^X - \mathbf{1}_b(j)\tau_B^X - (1 - \mathbf{1}_{AB}(ij))\tau_{AB}^X \right) I_{ij}^X + \mu \left( \sum_{\ell} (I_{\ell j}^X + I_{i \ell}^X) - 4I_{ij}^X \right). \quad (40)$$

607 If we let  $r_{ij}^X$  denote the per-capita growth term of an  $ij$ -infection in subpopulation  $X$  (the first  
 608 term in brackets in equation (40)), we can partition this as

$$r_{ij}^X = r^X + \mathbf{1}_A(i)s_A^X + \mathbf{1}_B(j)s_B^X + \mathbf{1}_{AB}(ij)s_{AB}^X \quad (41)$$

609 where

$$\begin{aligned} r^X &= \beta_{ab}^X S^X - \alpha_{ab}^X - \tau_A^X - \tau_B^X - \tau_{AB}^X \\ s_A^X &= -(\beta_{ab}^X - \beta_{Ab}^X) S^X - (\alpha_{Ab}^X - \alpha_{ab}^X) + \tau_A^X \\ s_B^X &= -(\beta_{ab}^X - \beta_{aB}^X) S^X - (\alpha_{aB}^X - \alpha_{ab}^X) + \tau_B^X \\ s_{AB}^X &= (\beta_{ab}^X + \beta_{AB}^X - \beta_{Ab}^X - \beta_{aB}^X) S^X - (\alpha_{ab}^X + \alpha_{AB}^X - \alpha_{Ab}^X - \alpha_{aB}^X) + \tau_{AB}^X \end{aligned} \quad (42)$$

610 This notation and formulation differs from that of [19, 35] in that they assumed costs were mul-  
 611 tiplicative, that is,

$$\beta_{ab}^X = \beta^X, \quad \beta_{Ab}^X = \beta^X c_{\beta_A}^X, \quad \beta_{aB}^X = \beta^X c_{\beta_B}^X, \quad \beta_{AB}^X = \beta^X c_{\beta_A}^X c_{\beta_B}^X \quad (43)$$

612 and

$$\alpha_{ab}^X = \alpha^X, \quad \alpha_{Ab}^X = \frac{\alpha^X}{c_{\alpha_A}^X}, \quad \alpha_{aB}^X = \frac{\alpha^X}{c_{\alpha_B}^X}, \quad \alpha_{AB}^X = \frac{\alpha^X}{c_{\alpha_A}^X c_{\alpha_B}^X} \quad (44)$$

613 where  $0 \leq c_{\beta_\ell}^X \leq 1$  and  $0 \leq c_{\alpha_\ell}^X \leq 1$ . The problem with multiplicative costs is apparent when we  
614 compute epistasis,

$$s_{AB}^X = \beta^X (1 - c_{\beta_A}^X)(1 - c_{\beta_B}^X) S^X - \alpha^X \frac{(1 - c_{\alpha_A}^X)(1 - c_{\alpha_B}^X)}{c_{\alpha_A}^X c_{\alpha_B}^X} + \tau_{AB}^X. \quad (45)$$

615 Here we can see that for the model of [19], only when there are no costs of resistance and no  
616 combination treatment will there be no epistasis. Thus transmission costs will produce positive  
617 epistasis and duration of carriage costs will produce negative epistasis in the model of [19].

618 In Figure 5 we consider three scenarios; whenever possible we choose parameter values  
619 to agree with those of Figure 4 in [19]. In each scenario we assume there are 20 independent  
620 populations, that the per-capita mutation rate is  $\mu = 10^{-10}$ , and there is no epistasis,  $s_{AB}^X = 0$ . In  
621 subplot 5a, we set  $\beta_{ab}^X = 2$ , while duration of carriage varies by population from  $\alpha_{ab}^X = 0.25$  to  
622  $\alpha_{ab}^X = 1.75$ . In subplot 5b we set  $\alpha_{ab}^X = 0.5$ , while transmission varies by population from  $\beta_{ab}^X = 1$   
623 to  $\beta_{ab}^X = 3$ . In both subplots 5a and 5b,  $\alpha_{Ab}^X = \alpha_{aB}^X = \alpha_{ab}^X$ , while  $\beta_{ab}^X - \beta_{Ab}^X = \beta_{ab}^X - \beta_{aB}^X = 0.1$ .  
624 Finally in subplot 5c,  $\beta_{ab}^X = \beta_{Ab}^X = \beta_{aB}^X = 2$ , while duration of carriage varies by population from  
625  $\alpha_{ab}^X = 0.25$  to  $\alpha_{ab}^X = 1.75$ , with  $\alpha_{Ab}^X - \alpha_{aB}^X = \alpha_{aB}^X - \alpha_{ab}^X = 0.05$ .

### 626 1.4.3 Constrasting drug prescription strategies in a hospital-community setting

627 When we model the hospital and community, we use equation (2) and assume the susceptible  
628 host density is controlled by

$$\begin{aligned} \frac{dS^X}{dt} = & \theta^X - dS^X - m^{X \rightarrow X'} S^X + m^{X' \rightarrow X} S^{X'} - \sum_{ij} \beta_{ij}^X I_{ij}^X S^X \\ & + \sum_{ij} (\alpha_{ij}^X - d) I_{ij}^X + \sum_{ij} (\tau_A^X \mathbf{1}_a(i) + \tau_B^X \mathbf{1}_b(j) + \tau_{AB}^X (1 - \mathbf{1}_{AB}(ij))) I_{ij}^X \end{aligned} \quad (46)$$

629 where  $\theta^X$  is the influx of new hosts and  $d$  is the background mortality rate.

630 In the hospital/community model, we assume population  $C$  is the ‘community’ and popu-  
631 lation  $H$  is the ‘hospital’. Therefore we let  $\theta^H = 0$ , and  $m^{C \rightarrow H} = m / \sum_{ij} I_{ij}^C$  be the rate at which  
632 individuals are admitted to the hospital, which is independent of population size. Individuals  
633 exit the hospital at a constant rate  $m^{H \rightarrow C}$ , so they spend on average  $1/m^{H \rightarrow C}$  time units in hos-  
634 pital (assuming background mortality is low). The specification of the migration rates in this  
635 way allows us to ensure the ‘community’ is always much larger than the ‘hospital’.

636 Parameters used in Figure 6 are  $\beta_{ab}^X = 2$ ,  $\beta_{ab}^X - \beta_{Ab}^X = \beta_{ab}^X - \beta_{aB}^X = 0.4$ ,  $\alpha_{ab}^X = 0.1$ ,  $\alpha_{Ab}^X - \alpha_{aB}^X =$   
637  $\alpha_{aB}^X - \alpha_{ab}^X = 0.02$ ,  $d = 0.01$ ,  $\theta^C = 0.2$ ,  $\theta^H = 0$ ,  $m^{H \rightarrow C} = 0.5$ ,  $m = 0.2$ ,  $\mu = 10^{-7}$ ,  $\sigma = 0$ .

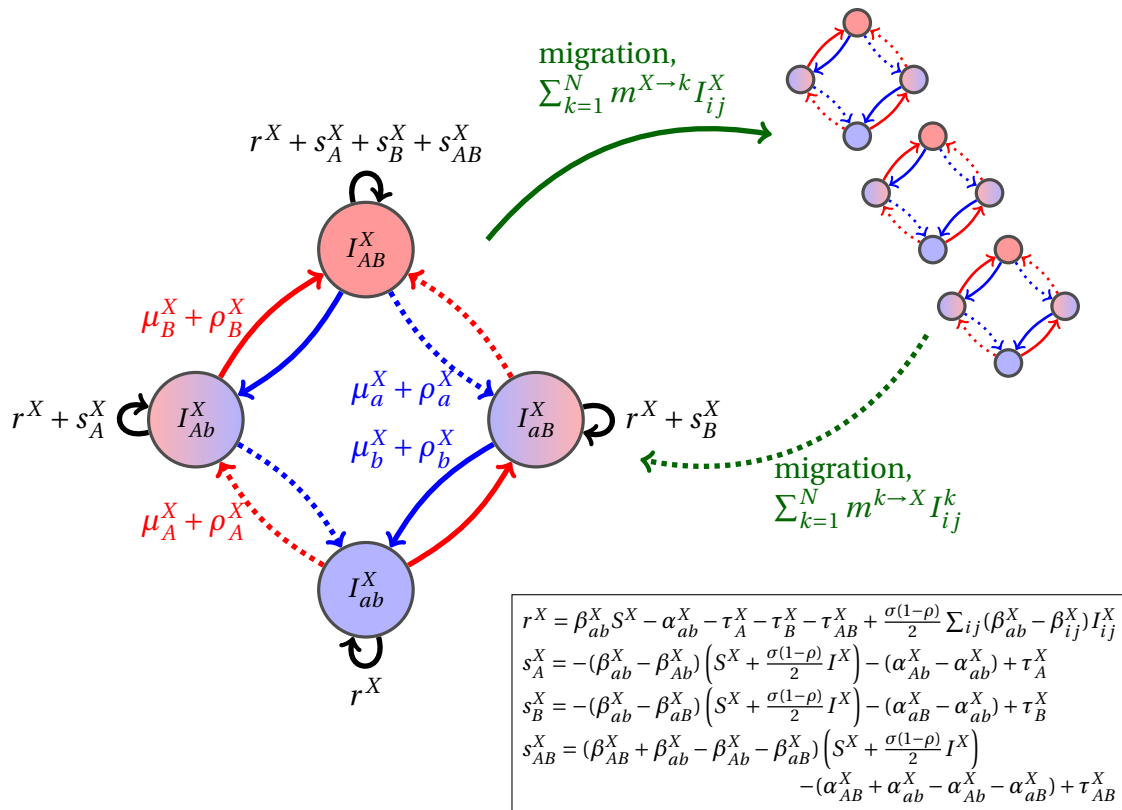

Figure 1: **Schematic of the dynamics of system (2).** The metapopulation consists of  $N$  connected populations. Each population has four possible types of infections, linked by one-step mutation or recombination (blue and red arrows), whose per-capita rates are independent of genetic background. The ‘baseline’ per-capita growth rate of sensitive infections is  $r^X$ , the additive selection coefficients for drug  $A$  and  $B$  resistance are  $s_A^X$  and  $s_B^X$ , respectively, while  $s_{AB}^X$  denotes any epistatic interactions. In the inset, we compute these quantities for the specific model introduced in the main text.

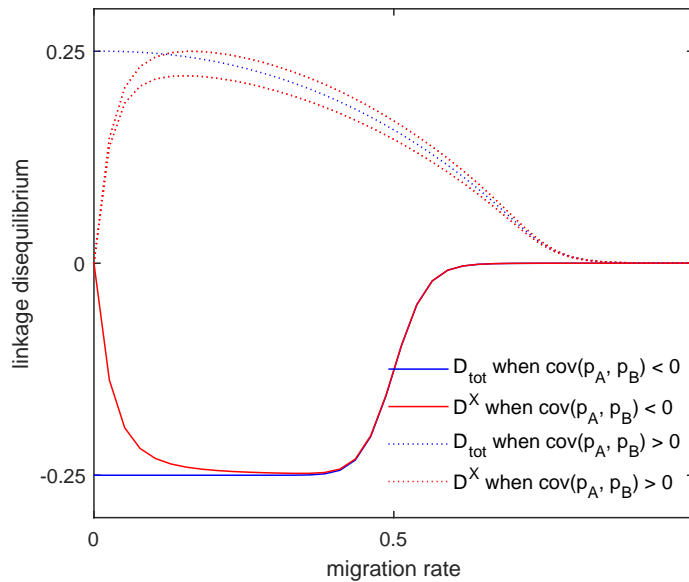

Figure 2: **The effect of migration upon LD at equilibrium depends upon the scale at which LD is measured.** Here we show equilibrium LD in a metapopulation consisting of four populations. Two scenarios are shown. In the first scenario, drug *A* is prescribed in two populations and drug *B* is prescribed in the other two populations at the same rate; this yields  $\text{cov}(p_A, p_B) < 0$ . Because we assume costs of resistance to either drug are identical, all the populations have identical LD. In the second scenario, drug *A* and drug *B* are prescribed in the same two populations while the other two populations receive no drugs; this yields  $\text{cov}(p_A, p_B) > 0$ . Since the drugs are prescribed unequally across populations, the LD observed in each of the two pairs of populations diverge.



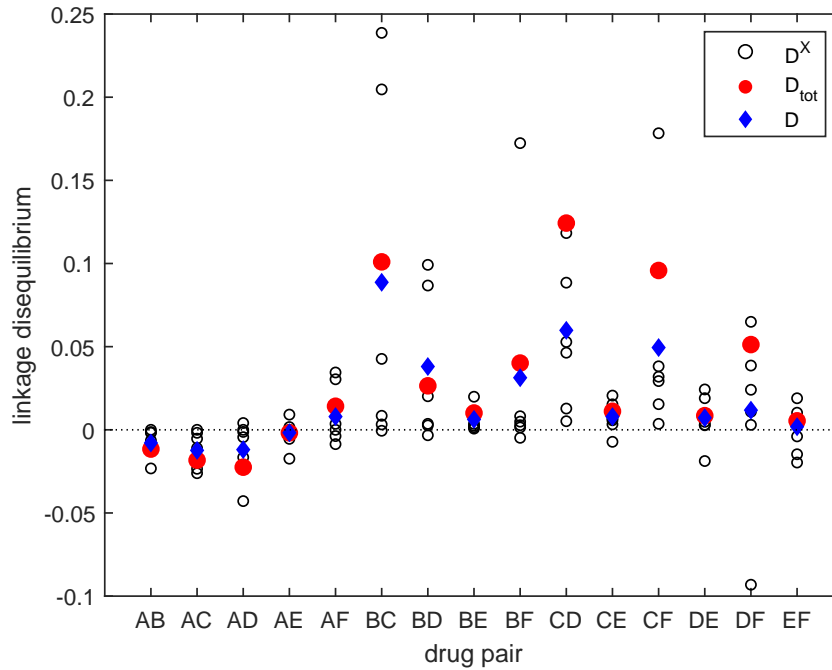

Figure 3: **Linkage disequilibrium for different drug pairs in *Streptococcus pneumoniae*.** Data is from the Maela data set of [19, 32]. The red circles are the observed population LD,  $D_{tot}$ , the blue diamonds are the average LD across serotypes,  $D$ , and the black circles are the LD of each serotype,  $D^X$ . We have restricted the data to serotypes involving 100 or more samples (serotypes 14, 6A/C, 6B, 15B/C, 19F, 23F). The drugs considered are: A = chloramphenicol, B = clindamycin, C = erythromycin, D = penicillin, E = sulphatrimethoprim, and F = tetracycline.

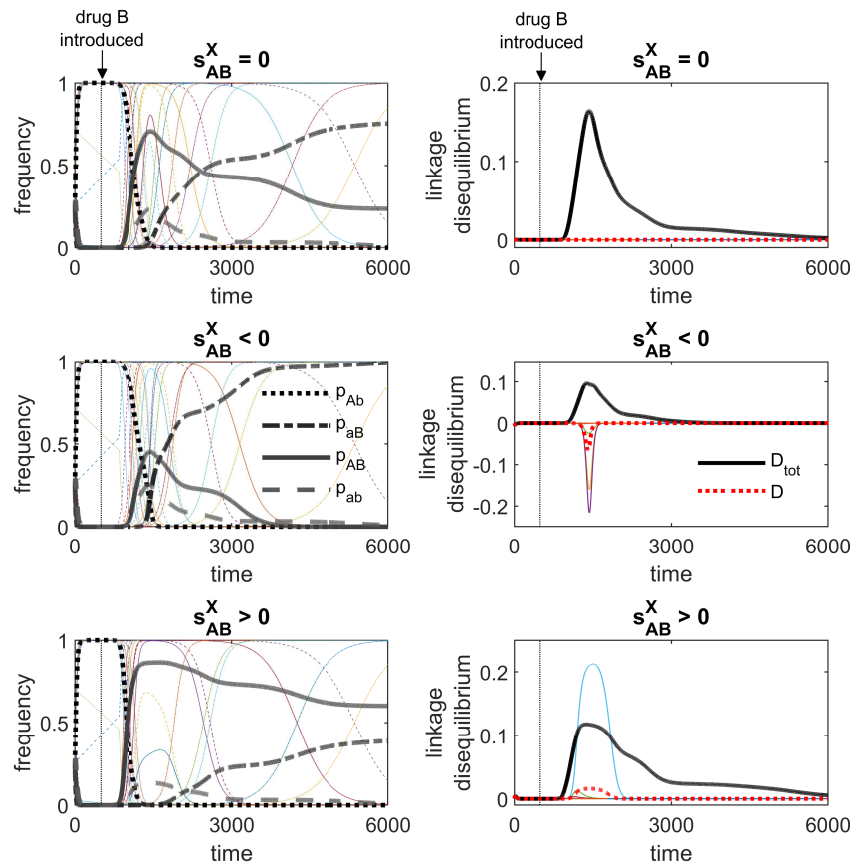

Figure 4: **Transient dynamics and epistasis can explain patterns of LD in *Streptococcus pneumoniae*.** In all simulations, serotypes differ based upon duration of carriage and transmissibility. Hosts are initially treated with drug *A* at a rate of  $\tau_A = 0.12$  per month. At  $t = 500$  (months), drug *B* is introduced, and drug *A* prescription reduced,  $(\tau_A, \tau_B) = (0.07, 0.1)$ . In the first row, there is no epistasis, while in the second row there is negative epistasis and in the third row, there is positive epistasis. The thin multicoloured lines denote the within-serotype dynamics. In all cases, at equilibrium both the serotypes and the metapopulation will be in linkage equilibrium, however, transient LD occurs on sufficiently long timescales so as to appear permanent.

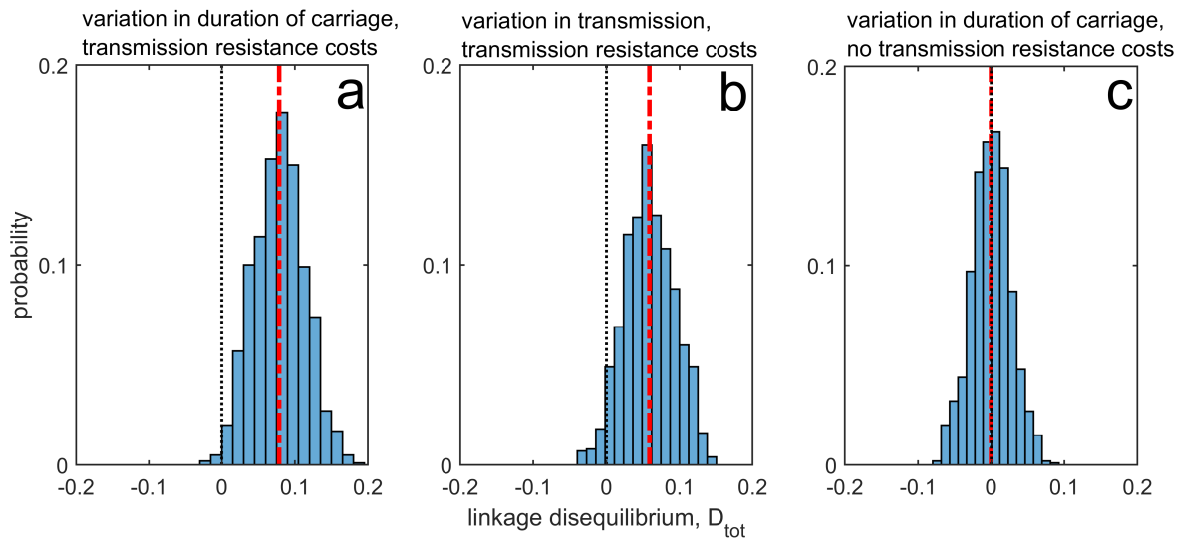

**Figure 5: Duration of carriage is one of many potential explanations for MDR overrepresentation at equilibrium.** Variation in duration of carriage across independent populations can lead to linkage disequilibrium (subplot **a**), but it is neither necessary (**b**), nor sufficient (**c**). We simulate 1000 populations (blue bars), each consisting of 20 independent populations in which treatment rates for each population are randomly chosen to be either  $\tau_{\max} = 0.075$  or  $\tau_{\min} = 0.025$  with equal probability while simultaneously satisfying  $\text{cov}(\tau_A, \tau_B) = 0$ . The dashed red line is the mean LD across the simulations for each scenario. In subplot **a**, duration of carriage varies across populations and there are transmission resistance costs; in subplot **b**, transmission varies and there are transmission resistance costs; while in subplot **c**, duration of carriage varies and there are no transmission costs. These simulations diverge slightly from those of [19] in that their model always includes epistasis (see Sup. Info.), whereas here we only consider nonepistatic scenarios.

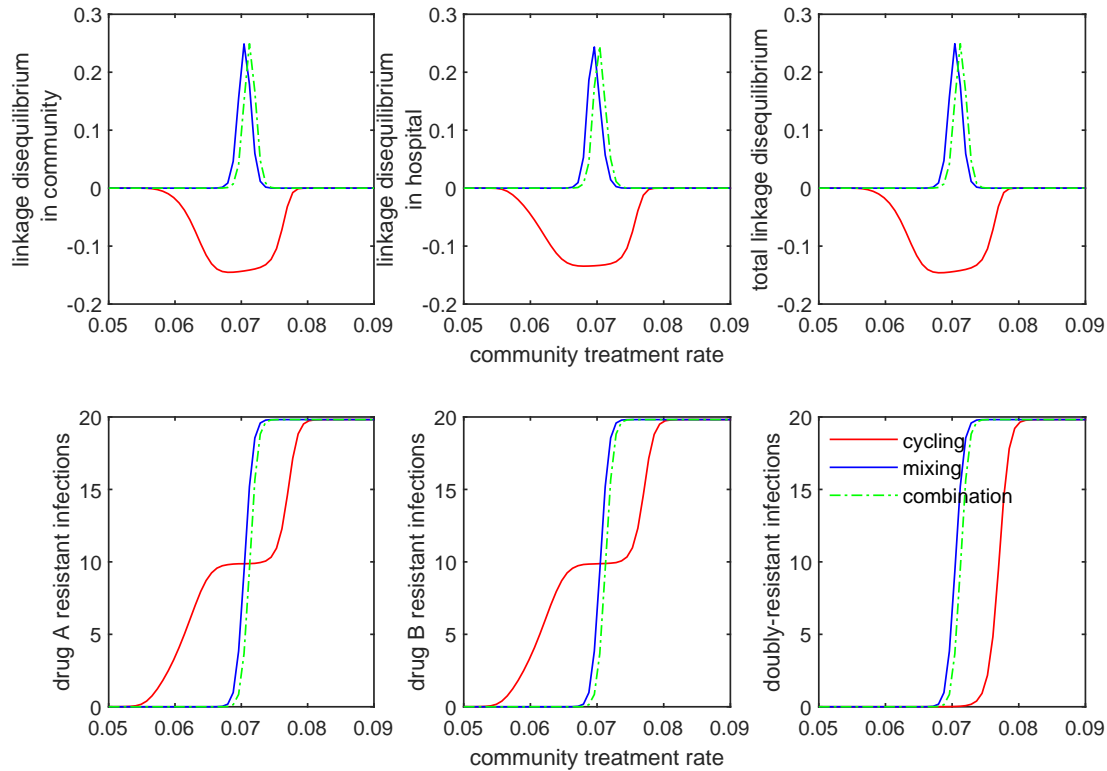

**Figure 6: Different antibiotic prescription strategies generate different patterns of LD at equilibrium.** Here we focus upon a population divided into a community and a hospital. Individuals enter the hospital at a fixed rate and spend a fifth of the time in the hospital that it takes to naturally clear a sensitive infection. The hospital/community size split corresponds to 20 beds per 1000 people, while individuals in the hospital receive antibiotics at 15x the rate they do in the community. We integrate system (2) until equilibrium is reached.

| Symbol                                | Description                                                                                                                                                                                                                   |
|---------------------------------------|-------------------------------------------------------------------------------------------------------------------------------------------------------------------------------------------------------------------------------|
| $I_{ij}^X$                            | Density of $ij$ -infections in population $X$ , where $i = A$ (resp. $i = a$ ) if infection is resistant (resp. sensitive) to drug $A$ and $j = B$ (resp. $j = b$ ) if infection is resistant (resp. sensitive) to drug $B$ . |
| $I^X$                                 | Density of total infections in population $X$ .                                                                                                                                                                               |
| $p_\ell^X, p_\ell$                    | Frequency of infections resistant to drug(s) $\ell$ in population $X$ and the metapopulation, respectively.                                                                                                                   |
| $D^X, D_{\text{tot}}, D$              | Linkage disequilibrium in population $X$ , the metapopulation, and the average across populations, respectively.                                                                                                              |
| $m^{X \rightarrow X'}$                | Per-capita rate at which hosts migrate from population $X$ to $X'$ .                                                                                                                                                          |
| $r^X, r$                              | Per-capita growth rate of sensitive infections in population $X$ and metapopulation (or ‘baseline’ per-capita growth rate).                                                                                                   |
| $s_\ell^X, s_\ell$                    | Additive selection coefficient for drug $\ell$ in population $X$ and the metapopulation, respectively.                                                                                                                        |
| $s_{AB}^X, s_{AB}$                    | Epistatic effect of being doubly-resistant in population $X$ and the metapopulation, respectively.                                                                                                                            |
| $\Delta\mu_{ij}^X, \Delta\rho_{ij}^X$ | Net change in $ij$ -infections in population $X$ due to mutation or recombination, respectively.                                                                                                                              |
| $\mu_\ell^X, \mu_\ell$                | Per-capita rate at which mutations generate allele $\ell$ .                                                                                                                                                                   |
| $\rho_\ell^X, \rho_\ell$              | Per-capita rate at which recombination leads to gain of allele $\ell$ .                                                                                                                                                       |
| $s^X, s$                              | Average selection for resistance of any type.                                                                                                                                                                                 |
| $\text{cov}(F, G)$                    | Covariance between the quantities $F$ and $G$ , that is, $\text{cov}(F, G) = \mathbb{E}[FG] - \mathbb{E}[F]\mathbb{E}[G]$ , where $\mathbb{E}[c]$ denotes the expectation of quantity $c$ .                                   |
| $\text{coskew}(F, G, H)$              | Coskewness between the quantities $F, G, H$ , that is, $\text{coskew}(F, G, H) = \mathbb{E}[(F - \mathbb{E}[F])(G - \mathbb{E}[G])(H - \mathbb{E}[H])]$ .                                                                     |

Table 1: Notation used in main text. In all cases, a quantity indexed with a superscript  $X$  is the population  $X$  quantity, whereas the absence of a superscript  $X$  implies the quantity is for the metapopulation.
